# Supplementary material
Source: PubMed Central journal article supplement (PMC4169326)

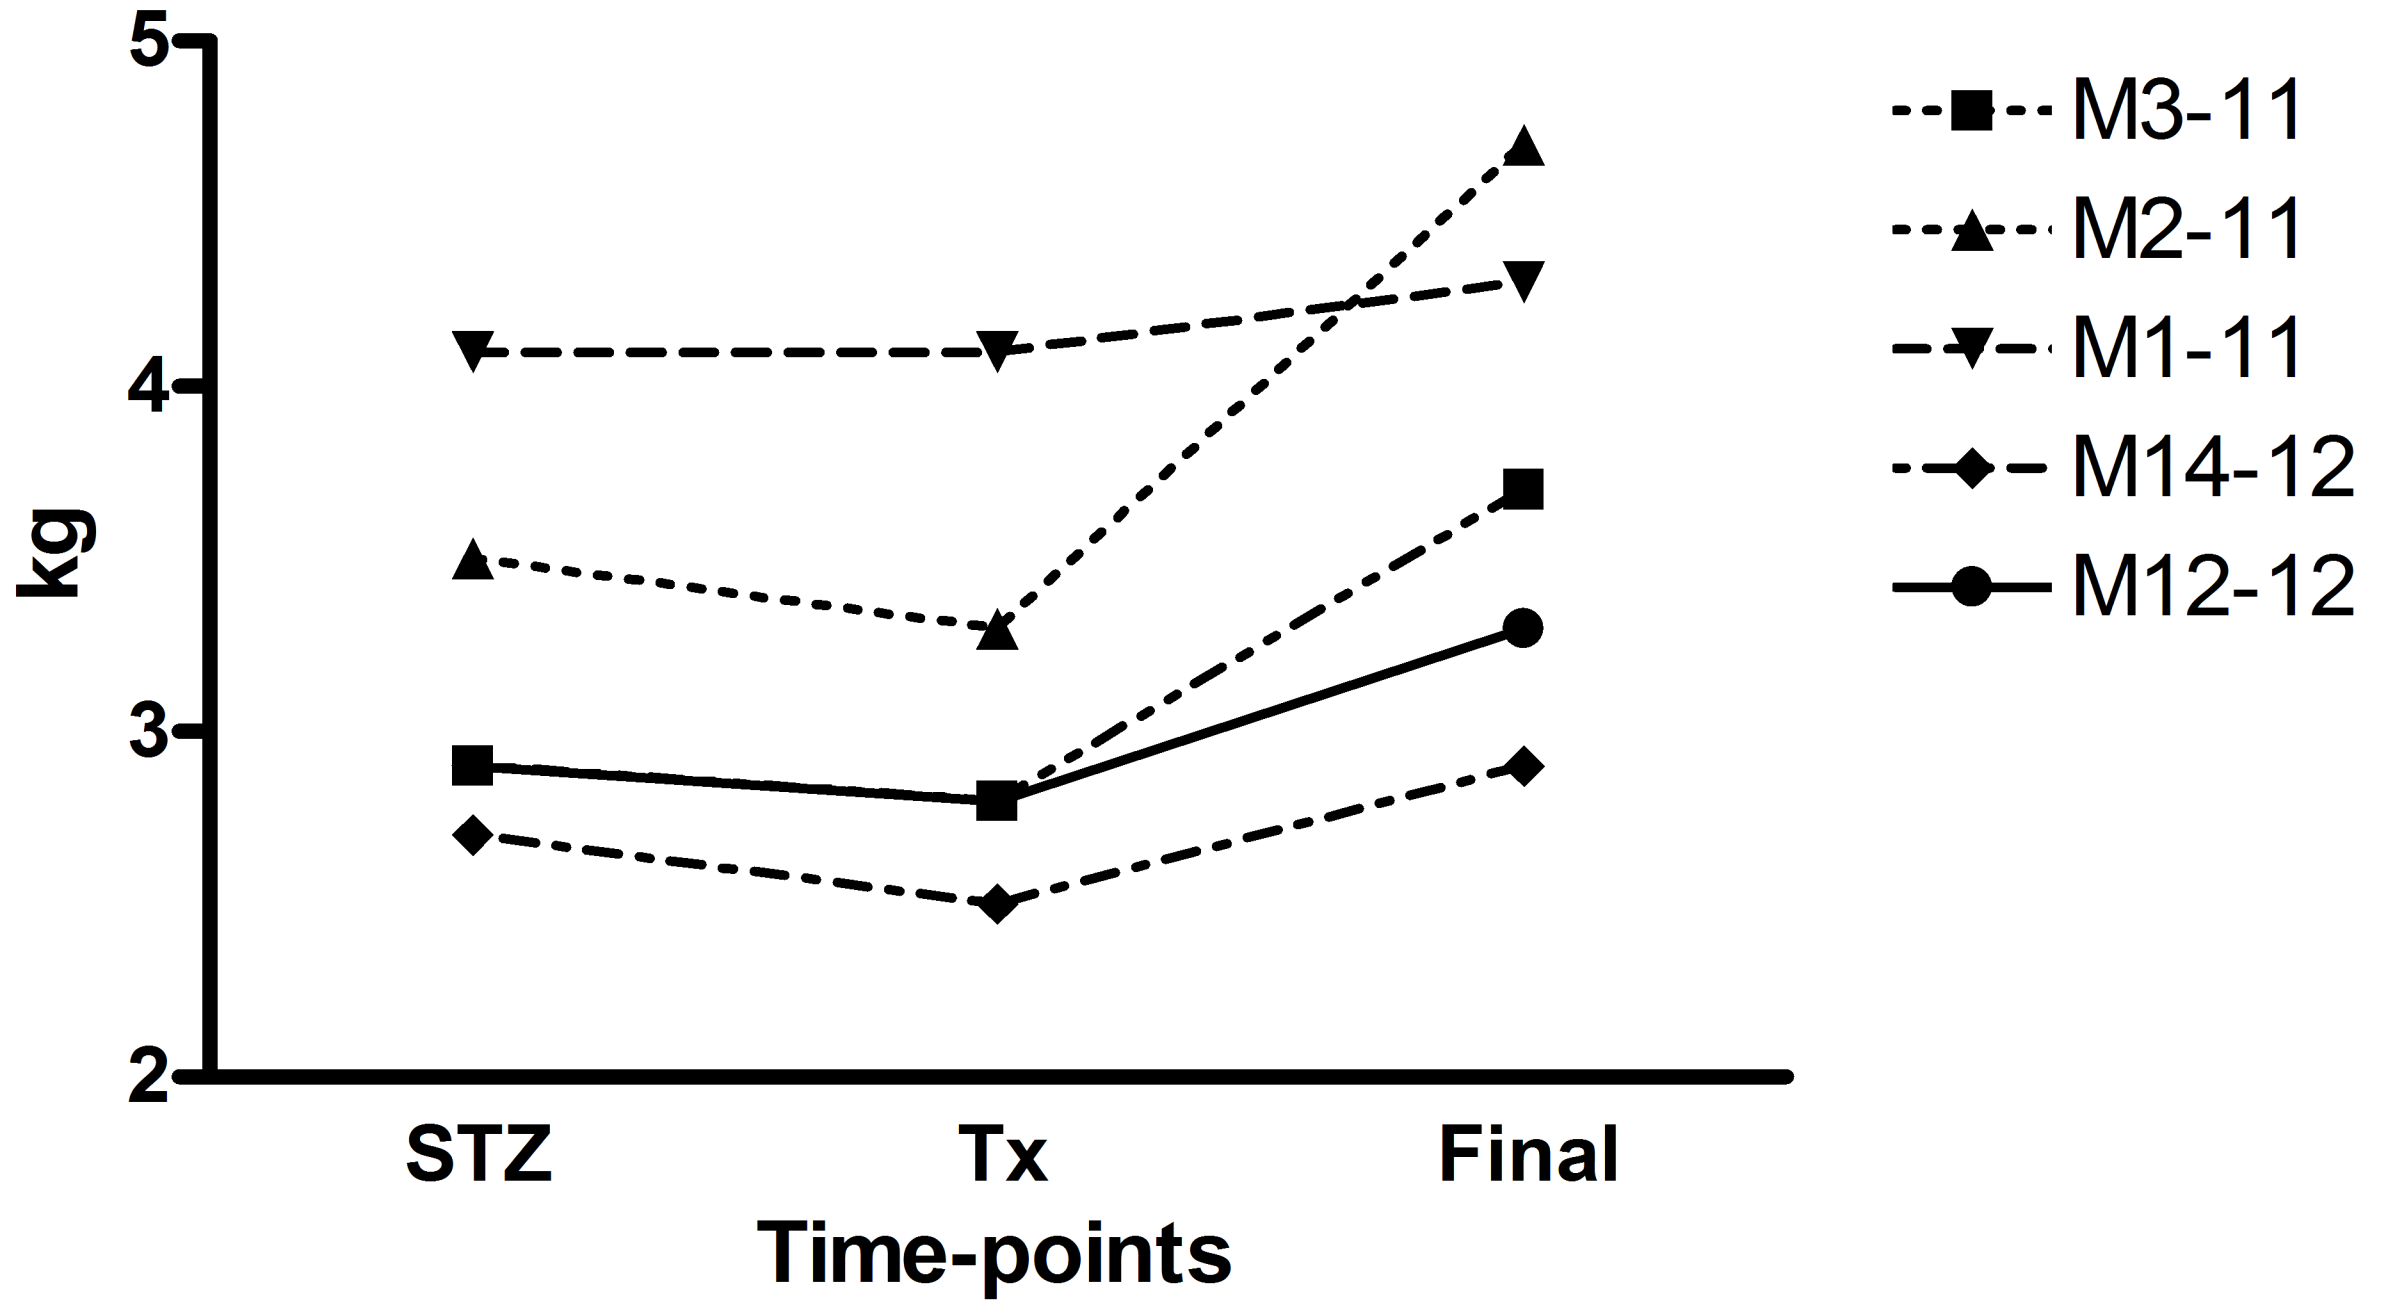

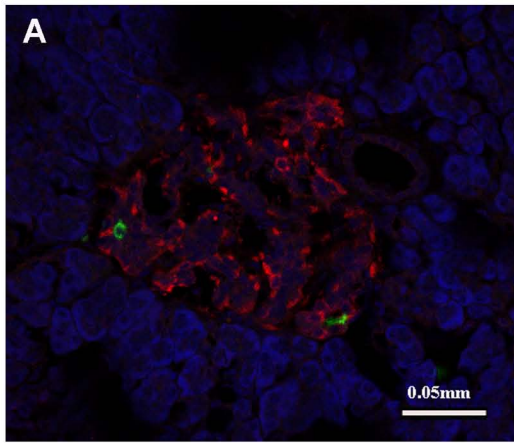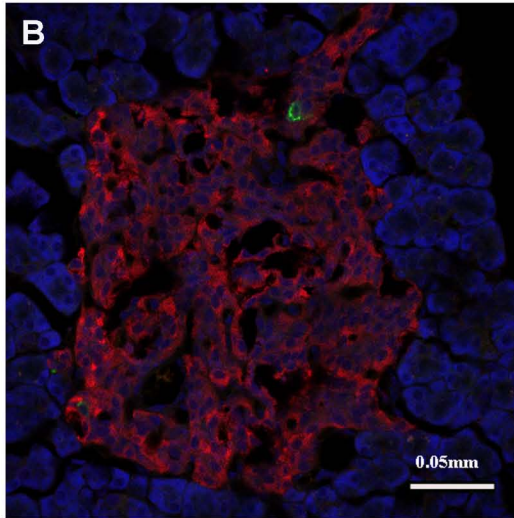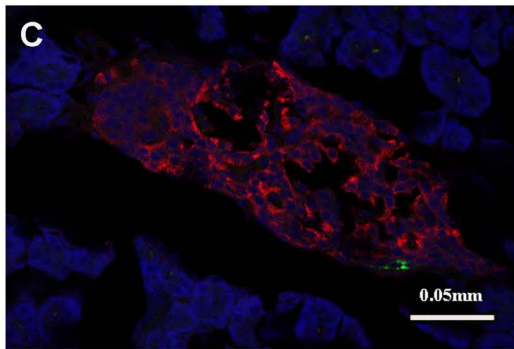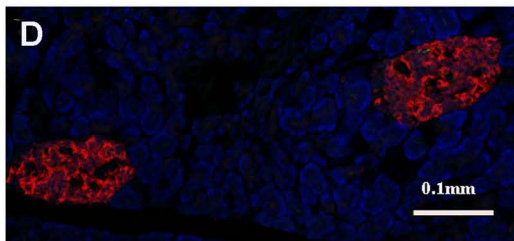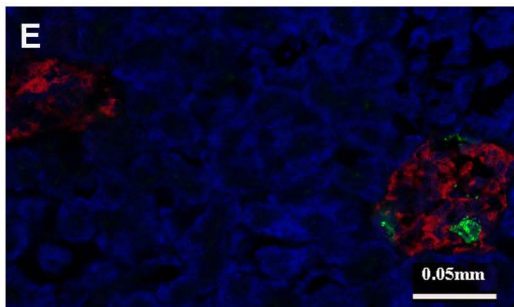

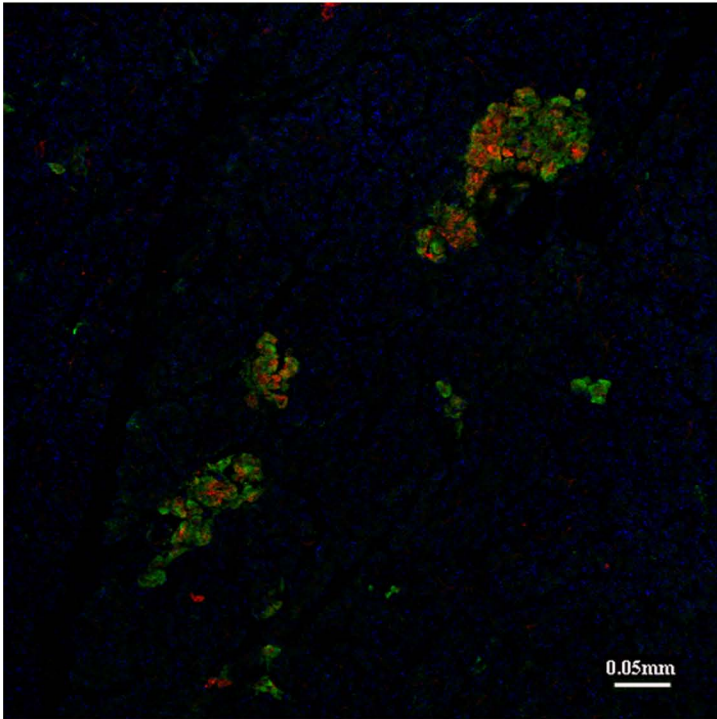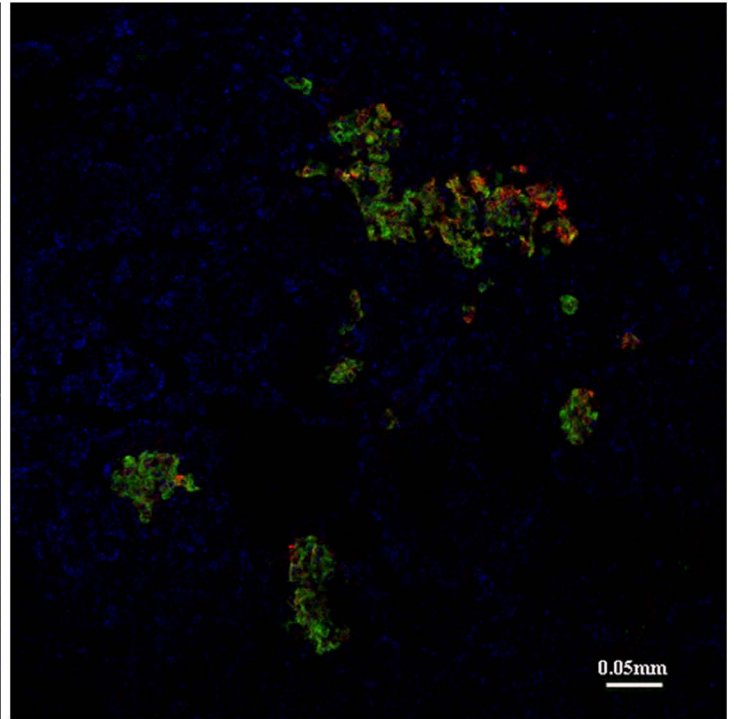

Supplement: NIHMS607137-supplement-Supp_FigureS1-S3.pdf [file NIHMS607137-supplement-Supp_FigureS1-S3.pdf]
